# Supplementary material for: Clinical Practice Guidelines for Functional Dyspepsia in Korea
Source: PubMed Central journal article supplement — J Neurogastroenterol Motil. 2020 Jan 30;26(1):29–50. doi: 10.5056/jnm19209 (PMC6955183; doi:10.5056/jnm19209), 2020-01-30
Supplement: JNM-26-029_Suppl.pdf [file JNM-26-029_Suppl.pdf]

**Supplementary Table 1.** Anti-secretory Agents (Proton Pump Inhibitors or Histamine 2 Receptor Antagonist in Patients With Dyspepsia

| I. Keywords                          |                   |                 |                   |
|--------------------------------------|-------------------|-----------------|-------------------|
| PICO                                 |                   | Keywords        | Remarks           |
| P                                    | MeSH<br>All Field | ※ Dyspepsia     |                   |
|                                      |                   | ※ Dyspepsia*    |                   |
|                                      |                   | ※ Dyspepsie*    |                   |
|                                      |                   | ※ Dyspeptic     |                   |
|                                      |                   | ※ Indigestion*  |                   |
|                                      |                   | ※ Upset stomach |                   |
|                                      |                   | ※ Stomach upset |                   |
|                                      |                   | ※ Apepsy        |                   |
|                                      |                   | ※ Apepsia       |                   |
|                                      |                   | I               | MeSH<br>All Field |
| ※ Histamine H2 antagonists           |                   |                 |                   |
| ※ Proton pump Inhibitor*             |                   |                 |                   |
| ※ Inhibitors, proton pump            |                   |                 |                   |
| ※ Antagonists, histamine H2          |                   |                 |                   |
| ※ Antihistaminics, H2                |                   |                 |                   |
| ※ Blockaders, H2 receptor            |                   |                 |                   |
| ※ Blockaders, histamine H2 receptor  |                   |                 |                   |
| ※ Blockers, histamine H2             |                   |                 |                   |
| ※ H2 antagonists, histamine          |                   |                 |                   |
| ※ H2 antihistamin*                   |                   |                 |                   |
| ※ H2 blockers, histamine             |                   |                 |                   |
| ※ H2 receptor blockader*             |                   |                 |                   |
| ※ H2RA                               |                   |                 |                   |
| ※ Histamine 2 antagonist*            |                   |                 |                   |
| ※ Histamine H2 antagonist*           |                   |                 |                   |
| ※ Histamine H2 blocker*              |                   |                 |                   |
| ※ Histamine H2 receptor antagonist*  |                   |                 |                   |
| ※ Histamine H2 receptor blockader*   |                   |                 |                   |
| ※ Receptor antagonists, histamine H2 |                   |                 |                   |
| ※ Receptor blockaders, H2            |                   |                 |                   |

Summary of the Literature Search

| I. Search Results |                  |         |             |
|-------------------|------------------|---------|-------------|
| No.               | DB               | Results | Duplication |
| 1                 | PubMed (Medline) | 351     | 104         |
| 2                 | EMBASE           | 195     |             |
| 3                 | Cochrane Library | 22      |             |
| 4                 | KoreaMed         | 16      |             |
|                   | Total            | 584     |             |
|                   |                  | 480     |             |

\* Medline Search Limits (PubMed)

- a. Humans
- b. Adult (19+)
- c. 2005~Curr.
- d. Language: Eng, Kor

| No. | Keyword                            | Results | Search category | Remarks                                                                                                                                                                                                   |
|-----|------------------------------------|---------|-----------------|-----------------------------------------------------------------------------------------------------------------------------------------------------------------------------------------------------------|
| 1   | Dyspepsia                          | 8 057   | MeSH            |                                                                                                                                                                                                           |
| 2   | Dyspepsia*                         | 10 063  | All Fields      |                                                                                                                                                                                                           |
| 3   | Dyspepsie*                         | 4       | All Fields      |                                                                                                                                                                                                           |
| 4   | Dyspeptic                          | 3 582   | All Fields      |                                                                                                                                                                                                           |
| 5   | Indigestion*                       | 854     | All Fields      |                                                                                                                                                                                                           |
| 6   | Upset stomach                      | 49      | All Fields      |                                                                                                                                                                                                           |
| 7   | Stomach upset                      | 60      | All Fields      |                                                                                                                                                                                                           |
| 8   | Apepsy                             | 0       | All Fields      |                                                                                                                                                                                                           |
| 9   | Apepsia                            | 2       | All Fields      |                                                                                                                                                                                                           |
| 10  | OR / 1-9                           | 14 818  |                 | (((((((((Dyspepsia[mesh]) OR Dyspepsia*[tiab]) OR Dyspepsie*[tiab]) OR Dyspeptic[tiab]) OR Indigestion*[tiab]) OR upset stomach[tiab]) OR stomach upset[tiab]) OR apepsy[tiab]) OR #56) OR apepsia[tiab]) |
| 11  | Proton pump inhibitors             | 8 988   | MeSH            |                                                                                                                                                                                                           |
| 12  | Proton pump Inhibitor*             | 11 474  | All Fields      |                                                                                                                                                                                                           |
| 13  | Inhibitors, proton pump            | 9 771   | All Fields      |                                                                                                                                                                                                           |
| 14  | OR / 11-13                         | 15 201  |                 | ((Proton pump inhibitors[mesh]) OR Proton pump Inhibitor*[tiab]) OR Inhibitors, proton pump[tiab]                                                                                                         |
| 15  | Histamine H2 antagonists           | 6 940   | MeSH            |                                                                                                                                                                                                           |
| 16  | Antagonists, histamine H2          | 1 726   | All Fields      |                                                                                                                                                                                                           |
| 17  | Antihistaminics, H2                | 65      | All Fields      |                                                                                                                                                                                                           |
| 18  | Blockaders, H2 receptor            | 26      | All Fields      |                                                                                                                                                                                                           |
| 19  | Blockaders, histamine H2 receptor  | 17      | All Fields      |                                                                                                                                                                                                           |
| 20  | Blockers, histamine H2             | 164     | All Fields      |                                                                                                                                                                                                           |
| 21  | H2 antagonists, histamine          | 4 527   | All Fields      |                                                                                                                                                                                                           |
| 22  | H2 antihistamin*                   | 189     | All Fields      |                                                                                                                                                                                                           |
| 23  | H2 blockers, histamine             | 6 256   | All Fields      |                                                                                                                                                                                                           |
| 24  | H2 receptor blockader*             | 24      | All Fields      |                                                                                                                                                                                                           |
| 25  | H2RA                               | 308     | All Fields      |                                                                                                                                                                                                           |
| 26  | Histamine 2 antagonist*            | 34      | All Fields      |                                                                                                                                                                                                           |
| 27  | Histamine H2 antagonist*           | 205     | All Fields      |                                                                                                                                                                                                           |
| 28  | Histamine H2 blocker*              | 54      | All Fields      |                                                                                                                                                                                                           |
| 29  | Histamine H2 receptor antagonist*  | 1 416   | All Fields      |                                                                                                                                                                                                           |
| 30  | Histamine H2 receptor blockader*   | 16      | All Fields      |                                                                                                                                                                                                           |
| 31  | Receptor antagonists, histamine H2 | 1 503   | All Fields      |                                                                                                                                                                                                           |
| 32  | Receptor blockaders, H2            | 27      | All Fields      |                                                                                                                                                                                                           |

\* Medline Search Limits (PubMed)

- a. Humans
- b. Adult (19+)
- c. 2005~Curr.
- d. Language: Eng, Kor

| No.                | Keyword      | Results | Search category | Remarks                                                                                                                                                                                                                                                                                                                                                                                                                                                                                                                                                                                                                                                                                                                                                                                                                                                                                                                                                                       |
|--------------------|--------------|---------|-----------------|-------------------------------------------------------------------------------------------------------------------------------------------------------------------------------------------------------------------------------------------------------------------------------------------------------------------------------------------------------------------------------------------------------------------------------------------------------------------------------------------------------------------------------------------------------------------------------------------------------------------------------------------------------------------------------------------------------------------------------------------------------------------------------------------------------------------------------------------------------------------------------------------------------------------------------------------------------------------------------|
| 33                 | OR / 15-32   | 10 948  |                 | ((((((((((((((((((Histamine H2 antagonists[mesh]) OR Antagonists histamine H2[tiab]) OR Antihistaminics H2[tiab]) OR Blockaders H2 receptor[tiab]) OR Blockaders histamine H2 receptor[tiab]) OR Blockers histamine H2[tiab]) OR H2 antagonists histamine[tiab]) OR H2 antihistamin*[tiab]) OR H2 blockers histamine[tiab]) OR H2 receptor blockader*[tiab]) OR H2RA[tiab]) OR Histamine 2 antagonist*[tiab]) OR Histamine H2 antagonist*[tiab]) OR Histamine H2 blocker*[tiab]) OR Histamine H2 receptor antagonist*[tiab]) OR Histamine H2 receptor blockader*[tiab]) OR Receptor antagonists histamine H2[tiab]) OR Receptor blockaders H2[tiab]                                                                                                                                                                                                                                                                                                                           |
| 34                 | OR / 14, 33  | 24 533  |                 | (((((Proton pump inhibitors[mesh]) OR Proton pump Inhibitor*[tiab]) OR Inhibitors, proton pump[tiab])) OR (((((((((((((((((((Histamine H2 antagonists[mesh]) OR Antagonists histamine H2[tiab]) OR Antihistaminics H2[tiab]) OR Blockaders H2 receptor[tiab]) OR Blockaders histamine H2 receptor[tiab]) OR Blockers histamine H2[tiab]) OR H2 antagonists histamine[tiab]) OR H2 antihistamin*[tiab]) OR H2 blockers histamine[tiab]) OR H2 receptor blockader*[tiab]) OR H2RA[tiab]) OR Histamine 2 antagonist*[tiab]) OR Histamine H2 antagonist*[tiab]) OR Histamine H2 blocker*[tiab]) OR Histamine H2 receptor antagonist*[tiab]) OR Histamine H2 receptor blockader*[tiab]) OR Receptor antagonists histamine H2[tiab]) OR Receptor blockaders H2[tiab])                                                                                                                                                                                                               |
| 35                 | AND / 10, 34 | 1 233   |                 | (((((Proton pump inhibitors[mesh]) OR Proton pump Inhibitor*[tiab]) OR Inhibitors, proton pump[tiab])) OR (((((((((((((((((((Histamine H2 antagonists[mesh]) OR Antagonists histamine H2[tiab]) OR Antihistaminics H2[tiab]) OR Blockaders H2 receptor[tiab]) OR Blockaders histamine H2 receptor[tiab]) OR Blockers histamine H2[tiab]) OR H2 antagonists histamine[tiab]) OR H2 antihistamin*[tiab]) OR H2 blockers histamine[tiab]) OR H2 receptor blockader*[tiab]) OR H2RA[tiab]) OR Histamine 2 antagonist*[tiab]) OR Histamine H2 antagonist*[tiab]) OR Histamine H2 blocker*[tiab]) OR Histamine H2 receptor antagonist*[tiab]) OR Histamine H2 receptor blockader*[tiab]) OR Receptor antagonists histamine H2[tiab]) OR Receptor blockaders H2[tiab]))) AND (((((((((((((((Dyspepsia[mesh]) OR Dyspepsia*[tiab]) OR Dyspepsie*[tiab]) OR Dyspeptic[tiab]) OR Indigestion*[tiab]) OR Upset stomach[tiab]) OR Stomach upset[tiab]) OR Apepsy[tiab]) OR Apepsia[tiab]) |
| Total (Limitation) |              | 351     |                 |                                                                                                                                                                                                                                                                                                                                                                                                                                                                                                                                                                                                                                                                                                                                                                                                                                                                                                                                                                               |

\* Medline Search Limits (EMBASE)

- a. Humans
- b. Adult (19+)
- c. 2005~Curr.
- d. Language: Eng, Kor

| No.   | Keyword                            | Results | Search category | Remarks                                                                                                                                                                                                                                                                                                                                                                                                                                                                                                                                                                                                                                           |
|-------|------------------------------------|---------|-----------------|---------------------------------------------------------------------------------------------------------------------------------------------------------------------------------------------------------------------------------------------------------------------------------------------------------------------------------------------------------------------------------------------------------------------------------------------------------------------------------------------------------------------------------------------------------------------------------------------------------------------------------------------------|
| 1     | Dyspepsia                          | 8 320   | Emtree          | .exp/mj                                                                                                                                                                                                                                                                                                                                                                                                                                                                                                                                                                                                                                           |
| 2     | Dyspepsia*                         | 14 472  | All Fields      | .abti                                                                                                                                                                                                                                                                                                                                                                                                                                                                                                                                                                                                                                             |
| 3     | Dyspepsie*                         | 469     | All Fields      |                                                                                                                                                                                                                                                                                                                                                                                                                                                                                                                                                                                                                                                   |
| 4     | Dyspeptic                          | 4 985   | All Fields      |                                                                                                                                                                                                                                                                                                                                                                                                                                                                                                                                                                                                                                                   |
| 5     | Indigestion*                       | 2 856   | Emtree          |                                                                                                                                                                                                                                                                                                                                                                                                                                                                                                                                                                                                                                                   |
| 6     | upset stomach                      | 86      | All Fields      |                                                                                                                                                                                                                                                                                                                                                                                                                                                                                                                                                                                                                                                   |
| 7     | stomach upset                      | 24      | Emtree          |                                                                                                                                                                                                                                                                                                                                                                                                                                                                                                                                                                                                                                                   |
| 9     | apepsia                            | 3       | All Fields      |                                                                                                                                                                                                                                                                                                                                                                                                                                                                                                                                                                                                                                                   |
| 10    | OR / 1-9                           | 21 892  |                 |                                                                                                                                                                                                                                                                                                                                                                                                                                                                                                                                                                                                                                                   |
| 11    | Proton pump inhibitors             | 19 677  | Emtree          |                                                                                                                                                                                                                                                                                                                                                                                                                                                                                                                                                                                                                                                   |
| 12    | Proton pump Inhibitor*             | 18 281  | All Fields      |                                                                                                                                                                                                                                                                                                                                                                                                                                                                                                                                                                                                                                                   |
| 13    | Inhibitors, proton pump            | 31      | All Fields      |                                                                                                                                                                                                                                                                                                                                                                                                                                                                                                                                                                                                                                                   |
| 14    | OR / 11-13                         | 29 502  |                 |                                                                                                                                                                                                                                                                                                                                                                                                                                                                                                                                                                                                                                                   |
| 15    | histamine H2 receptor antagonist   | 28 361  | Emtree          |                                                                                                                                                                                                                                                                                                                                                                                                                                                                                                                                                                                                                                                   |
| 16    | Antagonists, histamine H2          | 0       | All Fields      |                                                                                                                                                                                                                                                                                                                                                                                                                                                                                                                                                                                                                                                   |
| 18    | Blockaders, H2 receptor            | 0       | All Fields      |                                                                                                                                                                                                                                                                                                                                                                                                                                                                                                                                                                                                                                                   |
| 19    | Blockaders, histamine H2 receptor  | 0       | All Fields      |                                                                                                                                                                                                                                                                                                                                                                                                                                                                                                                                                                                                                                                   |
| 20    | Blockers, histamine H2             | 0       | All Fields      |                                                                                                                                                                                                                                                                                                                                                                                                                                                                                                                                                                                                                                                   |
| 21    | H2 antagonists, histamine          | 2       | All Fields      |                                                                                                                                                                                                                                                                                                                                                                                                                                                                                                                                                                                                                                                   |
| 22    | H2 antihistamin*                   | 151     | All Fields      |                                                                                                                                                                                                                                                                                                                                                                                                                                                                                                                                                                                                                                                   |
| 23    | H2 blockers, histamine             | 0       | All Fields      |                                                                                                                                                                                                                                                                                                                                                                                                                                                                                                                                                                                                                                                   |
| 24    | H2 receptor blockader*             | 19      | All Fields      |                                                                                                                                                                                                                                                                                                                                                                                                                                                                                                                                                                                                                                                   |
| 25    | H2RA                               | 393     | All Fields      |                                                                                                                                                                                                                                                                                                                                                                                                                                                                                                                                                                                                                                                   |
| 26    | Histamine 2 antagonist*            | 72      | All Fields      |                                                                                                                                                                                                                                                                                                                                                                                                                                                                                                                                                                                                                                                   |
| 27    | Histamine H2 antagonist*           | 55      | All Fields      |                                                                                                                                                                                                                                                                                                                                                                                                                                                                                                                                                                                                                                                   |
| 28    | Histamine H2 blocker*              | 23      | All Fields      |                                                                                                                                                                                                                                                                                                                                                                                                                                                                                                                                                                                                                                                   |
| 29    | Histamine H2 receptor antagonist*  | 370     | All Fields      |                                                                                                                                                                                                                                                                                                                                                                                                                                                                                                                                                                                                                                                   |
| 30    | Histamine H2 receptor blockader*   | 16      | All Fields      |                                                                                                                                                                                                                                                                                                                                                                                                                                                                                                                                                                                                                                                   |
| 31    | Receptor antagonists, histamine H2 | 0       | All Fields      |                                                                                                                                                                                                                                                                                                                                                                                                                                                                                                                                                                                                                                                   |
| 32    | Receptor blockaders, H2            | 0       | All Fields      |                                                                                                                                                                                                                                                                                                                                                                                                                                                                                                                                                                                                                                                   |
| 33    | OR / 15-32                         | 28 977  |                 |                                                                                                                                                                                                                                                                                                                                                                                                                                                                                                                                                                                                                                                   |
| 34    | OR / 14, 33                        | 54 504  |                 |                                                                                                                                                                                                                                                                                                                                                                                                                                                                                                                                                                                                                                                   |
| 35    | AND / 10, 34                       | 2 460   |                 | #34 AND 'dyspepsia'/8928bdd/_Lib_Proxy_Url_Https/www.embase.com/de AND (2005:py OR 2006:py OR 2007:py OR 2008:py OR 2009:py OR 2010:py OR 2011:py OR 2012:py OR 2013:py OR 2014:py OR 2015:py OR 2016:py OR 2017:py) AND ([adult]/8928bdd/_Lib_Proxy_Url_Https/www.embase.com/lim OR [aged]/8928bdd/_Lib_Proxy_Url_Https/www.embase.com/lim OR [middle aged]/8928bdd/_Lib_Proxy_Url_Https/www.embase.com/lim OR [very elderly]/8928bdd/_Lib_Proxy_Url_Https/www.embase.com/lim) AND ('histamine h2 receptor antagonist'/8928bdd/_Lib_Proxy_Url_Https/www.embase.com/de OR 'proton pump inhibitor'/8928bdd/_Lib_Proxy_Url_Https/www.embase.com/de) |
| Total |                                    | 195     |                 |                                                                                                                                                                                                                                                                                                                                                                                                                                                                                                                                                                                                                                                   |

\* Medline Search Limits (Cochrane Library)

- a. Humans
- b. Adult (19+)
- c. 2005~Curr.
- d. Language: Eng, Kor

| No. | Keyword                            | Results | Search category | Remarks |
|-----|------------------------------------|---------|-----------------|---------|
| 1   | Dyspepsia                          | 5       | MeSH            |         |
| 2   | Dyspepsia*                         | 318     | All Fields      |         |
| 3   | Dyspepsie*                         | 12      | All Fields      |         |
| 4   | Dyspeptic                          | 25      | All Fields      |         |
| 5   | Indigestion*                       | 77      | All Fields      |         |
| 6   | Upset stomach                      | 69      | All Fields      |         |
| 7   | Stomach upset                      | 69      | All Fields      |         |
| 8   | Apepsy                             | 0       | All Fields      |         |
| 9   | Apepsia                            | 0       | All Fields      |         |
| 10  | OR / 1-9                           | 423     |                 |         |
| 11  | Proton pump inhibitors             | 17      | MeSH            |         |
| 12  | Proton pump Inhibitor*             | 110     | All Fields      |         |
| 13  | Inhibitors, proton pump            | 96      | All Fields      |         |
| 14  | OR / 11-13                         | 110     |                 |         |
| 15  | Histamine H2 antagonists           | 16      | MeSH            |         |
| 16  | Antagonists, histamine H2          | 48      | All Fields      |         |
| 17  | Antihistaminics, H2                | 1       | All Fields      |         |
| 18  | Blockaders, H2 receptor            | 0       | All Fields      |         |
| 19  | Blockaders, histamine H2 receptor  | 0       | All Fields      |         |
| 20  | Blockers, histamine H2             | 12      | All Fields      |         |
| 21  | H2 antagonists, histamine          | 48      | All Fields      |         |
| 22  | H2 antihistamin*                   | 19      | All Fields      |         |
| 23  | H2 blockers, histamine             | 12      | All Fields      |         |
| 24  | H2 receptor blockader*             | 0       | All Fields      |         |
| 25  | H2RA                               | 19      | All Fields      |         |
| 26  | Histamine 2 antagonist*            | 163     | All Fields      |         |
| 27  | Histamine H2 antagonist*           | 52      | All Fields      |         |
| 28  | Histamine H2 blocker*              | 15      | All Fields      |         |
| 29  | Histamine H2 receptor antagonist*  | 44      | All Fields      |         |
| 30  | Histamine H2 receptor blockader*   | 0       | All Fields      |         |
| 31  | Receptor antagonists, histamine H2 | 41      | All Fields      |         |
| 32  | Receptor blockaders, H2            | 0       | All Fields      |         |
| 33  | OR / 15-32                         | 173     |                 |         |
| 34  | OR / 14, 33                        | 238     |                 |         |
| 37  | AND / 10, 34                       | 26      |                 |         |
|     | Total                              |         | 22              |         |

\* Medline Search Limits (KoreaMed)

- a. Humans
- b. Adult (19+)
- c. 2005~Curr.
- d. Language: Eng, Kor

| No. | Keyword                            | Results | Search category | Remarks                                                                                                                                                                                                                                                                                                                                                                    |
|-----|------------------------------------|---------|-----------------|----------------------------------------------------------------------------------------------------------------------------------------------------------------------------------------------------------------------------------------------------------------------------------------------------------------------------------------------------------------------------|
| 1   | Dyspepsia*                         | 554     | All Fields      |                                                                                                                                                                                                                                                                                                                                                                            |
| 2   | Dyspepsie*                         | 0       | All Fields      |                                                                                                                                                                                                                                                                                                                                                                            |
| 3   | Dyspeptic                          | 61      | All Fields      |                                                                                                                                                                                                                                                                                                                                                                            |
| 4   | Indigestion*                       | 199     | All Fields      |                                                                                                                                                                                                                                                                                                                                                                            |
| 5   | Upset stomach                      | 1       | All Fields      |                                                                                                                                                                                                                                                                                                                                                                            |
| 6   | Stomach upset                      | 2       | All Fields      |                                                                                                                                                                                                                                                                                                                                                                            |
| 7   | Apepsy                             | 0       | All Fields      |                                                                                                                                                                                                                                                                                                                                                                            |
| 8   | Apepsia                            | 0       | All Fields      |                                                                                                                                                                                                                                                                                                                                                                            |
| 9   | OR / 1-8                           | 614     |                 | Dyspepsia* [ALL] OR Dyspeptic [ALL] OR Indigestion* [ALL] OR "Upset stomach" [ALL] OR "Stomach upset" [ALL]                                                                                                                                                                                                                                                                |
| 10  | Proton pump Inhibitor*             | 391     | All Fields      |                                                                                                                                                                                                                                                                                                                                                                            |
| 11  | Inhibitors, proton pump            | 37      | All Fields      |                                                                                                                                                                                                                                                                                                                                                                            |
| 12  | OR / 10-11                         | 391     |                 |                                                                                                                                                                                                                                                                                                                                                                            |
| 13  | Antagonists, histamine H2          | 0       | All Fields      |                                                                                                                                                                                                                                                                                                                                                                            |
| 14  | Antihistaminics, H2                | 1       | All Fields      |                                                                                                                                                                                                                                                                                                                                                                            |
| 15  | Blockaders, H2 receptor            | 0       | All Fields      |                                                                                                                                                                                                                                                                                                                                                                            |
| 16  | Blockaders, histamine H2 receptor  | 0       | All Fields      |                                                                                                                                                                                                                                                                                                                                                                            |
| 17  | Blockers, histamine H2             | 0       | All Fields      |                                                                                                                                                                                                                                                                                                                                                                            |
| 18  | H2 antagonists, histamine          | 0       | All Fields      |                                                                                                                                                                                                                                                                                                                                                                            |
| 19  | H2 antihistamin*                   | 7       | All Fields      |                                                                                                                                                                                                                                                                                                                                                                            |
| 20  | H2 blockers, histamine             | 2       | All Fields      |                                                                                                                                                                                                                                                                                                                                                                            |
| 21  | H2 receptor blockader*             | 0       | All Fields      |                                                                                                                                                                                                                                                                                                                                                                            |
| 22  | H2RA                               | 8       | All Fields      |                                                                                                                                                                                                                                                                                                                                                                            |
| 23  | Histamine 2 antagonist*            | 3       | All Fields      |                                                                                                                                                                                                                                                                                                                                                                            |
| 24  | Histamine H2 antagonist*           | 17      | All Fields      |                                                                                                                                                                                                                                                                                                                                                                            |
| 25  | Histamine H2 blocker*              | 0       | All Fields      |                                                                                                                                                                                                                                                                                                                                                                            |
| 26  | Histamine H2 receptor antagonist*  | 7       | All Fields      |                                                                                                                                                                                                                                                                                                                                                                            |
| 27  | Histamine H2 receptor blockader*   | 0       | All Fields      |                                                                                                                                                                                                                                                                                                                                                                            |
| 28  | Receptor antagonists, histamine H2 | 0       | All Fields      |                                                                                                                                                                                                                                                                                                                                                                            |
| 29  | Receptor blockaders, H2            | 0       | All Fields      |                                                                                                                                                                                                                                                                                                                                                                            |
| 30  | OR / 13-29                         | 34      |                 |                                                                                                                                                                                                                                                                                                                                                                            |
| 31  | OR / 12, 30                        | 392     |                 | Antihistaminics, [ALL] H2 [ALL] OR H2 [ALL] antihistamin* [ALL] OR H2 [ALL] blockers, [ALL] histamine [ALL] OR H2RA [ALL] OR Histamine [ALL] 2 [ALL] antagonist* [ALL] OR Histamine [ALL] H2 [ALL] antagonist* [ALL] OR Histamine [ALL] H2 [ALL] receptor [ALL] antagonist* [ALL] OR Proton [ALL] pump [ALL] Inhibitor* [ALL] OR Inhibitors, [ALL] proton [ALL] pump [ALL] |
| 34  | AND / 9, 31                        | 21      |                 |                                                                                                                                                                                                                                                                                                                                                                            |
|     | Total                              |         | 16              |                                                                                                                                                                                                                                                                                                                                                                            |

**Supplementary Table 2.** *Helicobacter pylori* Eradication in Patients With Dyspepsia

| I. Keywords |                             |                            |                           |  |
|-------------|-----------------------------|----------------------------|---------------------------|--|
| PICO        |                             | Keywords                   | Remarks                   |  |
| P           | MeSH                        | ※ Dyspepsia                |                           |  |
|             |                             | All Field                  | ※ Dyspepsia*              |  |
|             |                             |                            | ※ Dyspeptic               |  |
|             |                             |                            | ※ Indigest*               |  |
|             |                             |                            | ※ Maldigest*              |  |
|             |                             |                            | ※ Lienteric               |  |
|             |                             |                            | ※ Apeps*                  |  |
|             |                             |                            | ※ Dyspepsie*              |  |
|             |                             |                            | ※ Upset Stomach           |  |
|             |                             |                            | ※ Stomach Upset           |  |
|             |                             |                            | ※ Non-ulcer Dyspepsia     |  |
|             |                             |                            | ※ Funtional Dyspepsia*    |  |
|             | I                           | MeSH                       | ※ Helicobacter Pylori     |  |
|             |                             |                            | ※ Helicobacter Infections |  |
|             |                             |                            | ※ Anti-Bacterial Agents   |  |
|             |                             |                            | ※ Anti-Ulcer Agents       |  |
| All Field   |                             |                            | ※ Helicobacter Pylori     |  |
|             |                             |                            | ※ H. Pylori               |  |
|             |                             |                            | ※ Campylobacter Pylori    |  |
|             |                             |                            | ※ Helicobacter Infect*    |  |
|             |                             |                            | ※ Infect* Helicobacter    |  |
|             |                             |                            | ※ Eradicat*               |  |
|             |                             |                            | ※ Eradicant*              |  |
|             |                             |                            | ※ Anti Bacterial*         |  |
|             |                             |                            | ※ Antibacterial*          |  |
|             |                             | ※ Bacteriocid*             |                           |  |
|             |                             | ※ Anti-Helicobacter Pylori |                           |  |
|             | ※ Anti-Campylobacter Pylori |                            |                           |  |
|             | ※ Anti-Ulcer Agent*         |                            |                           |  |



Summary of the Literature Search

| I. Search Results |                  |         |             |
|-------------------|------------------|---------|-------------|
| No.               | DB               | Results | Duplication |
| 1                 | PubMed (Medline) | 125     | 189         |
| 2                 | OVID Medline     | 128     |             |
| 3                 | Embase           | 137     |             |
| 4                 | Cochrane Library | 9       |             |
| 5                 | KoreaMed         | 14      |             |
|                   | Total            | 413     |             |
|                   |                  | 224     |             |

\* Medline Search Limits (PubMed)

- a. Humans
- b. Adult (19+)
- c. English, Korean
- d. 2007~Curr.
- e. RCT/Clinical Trials/Meta-Analysis

| No. | Keyword                 | Results | Search category | Remarks |
|-----|-------------------------|---------|-----------------|---------|
| 1   | Dyspepsia               | 8 068   | MeSH            |         |
| 2   | Dyspepsia*              | 12 636  | All Fields      |         |
| 3   | Dyspeptic               | 3 589   | All Fields      |         |
| 4   | Dyspepsie*              | 16      | All Fields      |         |
| 5   | Indigest*               | 1 990   | All Fields      |         |
| 6   | Maldigest*              | 606     | All Fields      |         |
| 7   | Upset stomach           | 141     | All Fields      |         |
| 8   | Stomach upset           | 141     | All Fields      |         |
| 9   | Apepsy                  | 1       | All Fields      |         |
| 10  | Apepsia                 | 2       | All Fields      |         |
| 11  | Non-ulcer Dyspepsia     | 1 092   | All Fields      |         |
| 12  | Functional Dyspepsia*   | 2 629   | All Fields      |         |
| 13  | OR / 1-12               | 16 614  |                 |         |
| 14  | Helicobacter Pylori     | 31 559  | MeSH            |         |
| 15  | Helicobacter Pylori     | 40 059  | All Fields      |         |
| 16  | H. Pylori               | 40 696  | All Fields      |         |
| 17  | Campylobacter Pylori    | 40 829  | All Fields      |         |
| 18  | Helicobacter Infections | 27 439  | MeSH            |         |
| 19  | Helicobacter Infect*    | 27 548  | All Fields      |         |
| 20  | Infect* Helicobacter    | 34 650  | All Fields      |         |
| 21  | OR / 14-20              | 41 540  |                 |         |
| 22  | Eradicat*               | 54 177  | All Fields      |         |
| 23  | Eradicant*              | 5       | All Fields      |         |
| 24  | Eliminat*               | 282 521 | All Fields      |         |
| 25  | Anti-Bacterial Agents   | 321 795 | MeSH            |         |
| 26  | Anti-Ulcer Agents       | 12 770  | MeSH            |         |
| 27  | Anti-Ulcer Agent*       | 47 492  | All Fields      |         |
| 28  | Anti Bacterial*         | 287 513 | All Fields      |         |
| 29  | Antibacterial*          | 58 160  | All Fields      |         |
| 30  | Bacteriocid*            | 554     | All Fields      |         |
| 31  | OR / 22-30              | 714 389 |                 |         |

\* Medline Search Limits (PubMed)

- a. Humans
- b. Adult (19+)
- c. English, Korean
- d. 2007~Curr.
- e. RCT/Clinical Trials/Meta-Analysis

| No. | Keyword                   | Results | Search category | Remarks                                                                                                                                                                                                                                                                                                                                                                                                                                                                                                                                                                                                                                                                                                                                                                                           |
|-----|---------------------------|---------|-----------------|---------------------------------------------------------------------------------------------------------------------------------------------------------------------------------------------------------------------------------------------------------------------------------------------------------------------------------------------------------------------------------------------------------------------------------------------------------------------------------------------------------------------------------------------------------------------------------------------------------------------------------------------------------------------------------------------------------------------------------------------------------------------------------------------------|
| 32  | 21 AND 31                 | 13 762  |                 | ((((((((((Eradicat*) OR Eradicant*) OR Eliminat*) OR Anti-Bacterial Agents[mesh]) OR Anti-Ulcer Agents[mesh]) OR Anti-Ulcer Agent*) OR Anti Bacterial*) OR Antibacterial*) OR Bacteriocid*)) AND (((((((Helicobacter Pylori[mesh]) OR Helicobacter Pylori) OR H. Pylori) OR Campylobacter Pylori) OR Helicobacter Infections[mesh]) OR Helicobacter Infect*) OR Infect* Helicobacter)                                                                                                                                                                                                                                                                                                                                                                                                             |
| 33  | Anti-Helicobacter Pylori  | 813     | All Fields      |                                                                                                                                                                                                                                                                                                                                                                                                                                                                                                                                                                                                                                                                                                                                                                                                   |
| 34  | Anti-Campylobacter Pylori | 8       | All Fields      |                                                                                                                                                                                                                                                                                                                                                                                                                                                                                                                                                                                                                                                                                                                                                                                                   |
| 35  | OR / 32-34                | 14 059  |                 |                                                                                                                                                                                                                                                                                                                                                                                                                                                                                                                                                                                                                                                                                                                                                                                                   |
| 36  | 13 AND 35                 | 1 999   |                 | ((((((((((((((Eradicat*) OR Eradicant*) OR Eliminat*) OR Anti-Bacterial Agents[mesh]) OR Anti-Ulcer Agents[mesh]) OR Anti-Ulcer Agent*) OR Anti Bacterial*) OR Antibacterial*) OR Bacteriocid*)) AND (((((((((((((((Helicobacter Pylori[mesh]) OR Helicobacter Pylori) OR H. Pylori) OR Campylobacter Pylori) OR Helicobacter Infections[mesh]) OR Helicobacter Infect*) OR Infect* Helicobacter)))) OR Anti-Helicobacter Pylori) OR Anti-Campylobacter Pylori)) AND (((((((((((((((Dyspepsia [esh]) OR #2) OR Dyspepsia*) OR Dyspepsia[mesh]) OR Dyspeptic) OR Dyspepsie*) OR Indigest*) OR Maldigest*) OR "Upset stomach") OR "Stomach upset") OR Apepsy) OR jpepsy) OR Apepsia) OR Non-ulcer Dyspepsia) OR Funtional Dyspepsia*) OR functional Dyspepsia*) OR Upset stomach) OR Stomach upset) |
|     | Total                     |         | 125             |                                                                                                                                                                                                                                                                                                                                                                                                                                                                                                                                                                                                                                                                                                                                                                                                   |

\* OVID Medline Search Limits

- a. Humans
- b. Adult (19+)
- c. English, Korean
- d. 2007~Curr.
- e. RCT/Clinical Trials/Meta-Analysis

| No. | Keyword                 | Results | Search category | Remarks |
|-----|-------------------------|---------|-----------------|---------|
| 1   | Dyspepsia               | 8 264   | MeSH            |         |
| 2   | Dyspepsia*              | 9 985   | All Fields      |         |
| 3   | Dyspeptic               | 3 632   | All Fields      |         |
| 4   | Dyspepsie*              | 3       | All Fields      |         |
| 5   | Indigest*               | 2 013   | All Fields      |         |
| 6   | Maldigest*              | 615     | All Fields      |         |
| 7   | Upset stomach           | 50      | All Fields      |         |
| 8   | Stomach upset           | 59      | All Fields      |         |
| 9   | Apepsy                  | 0       | All Fields      |         |
| 10  | Apepsia                 | 2       | All Fields      |         |
| 11  | Non-ulcer Dyspepsia     | 1 042   | All Fields      |         |
| 12  | Funtional Dyspepsia*    | 0       | All Fields      |         |
| 13  | OR / 1-12               | 16 764  |                 |         |
| 14  | Helicobacter Pylori     | 32 458  | MeSH            |         |
| 15  | Helicobacter Pylori     | 36 278  | All Fields      |         |
| 16  | H. Pylori               | 24 287  | All Fields      |         |
| 17  | Campylobacter Pylori    | 922     | All Fields      |         |
| 18  | Helicobacter Infections | 28 301  | MeSH            |         |
| 19  | Helicobacter Infect*    | 541     | All Fields      |         |
| 20  | Infect* Helicobacter    | 79      | All Fields      |         |
| 21  | OR / 14-20              | 43 109  |                 |         |
| 22  | Eradicat*               | 53 715  | All Fields      |         |
| 23  | Eradicant*              | 5       | All Fields      |         |
| 24  | Eliminat*               | 284 080 | All Fields      |         |
| 25  | Anti-Bacterial Agents   | 293 266 | MeSH            |         |
| 26  | Anti-Ulcer Agents       | 13 056  | MeSH            |         |
| 27  | Anti-Ulcer Agent*       | 307     | All Fields      |         |
| 28  | Anti Bacterial*         | 2 420   | All Fields      |         |
| 29  | Antibacterial*          | 57 641  | All Fields      |         |
| 30  | Bacteriocid*            | 556     | All Fields      |         |
| 31  | OR / 22-30              | 655 778 |                 |         |

\* OVID Medline Search Limits

- a. Humans
- b. Adult (19+)
- c. English, Korean
- d. 2007~Curr.
- e. RCT/Clinical Trials/Meta-Analysis

| No. | Keyword                   | Results | Search category | Remarks                                                                                                                                                                                                                                                                                                                                                                                                                                                                                                                                                                                                                                                                                                                                                                                           |
|-----|---------------------------|---------|-----------------|---------------------------------------------------------------------------------------------------------------------------------------------------------------------------------------------------------------------------------------------------------------------------------------------------------------------------------------------------------------------------------------------------------------------------------------------------------------------------------------------------------------------------------------------------------------------------------------------------------------------------------------------------------------------------------------------------------------------------------------------------------------------------------------------------|
| 32  | 21 AND 31                 | 13 745  |                 | ((((((((((Eradicat*) OR Eradicant*) OR Eliminat*) OR Anti-Bacterial Agents[mesh]) OR Anti-Ulcer Agents[mesh]) OR Anti-Ulcer Agent*) OR Anti Bacterial*) OR Antibacterial*) OR Bacteriocid*)) AND (((((((Helicobacter Pylori[mesh]) OR Helicobacter Pylori) OR H. Pylori) OR Campylobacter Pylori) OR Helicobacter Infections[mesh]) OR Helicobacter Infect*) OR Infect* Helicobacter)                                                                                                                                                                                                                                                                                                                                                                                                             |
| 33  | Anti-Helicobacter Pylori  | 674     | All Fields      |                                                                                                                                                                                                                                                                                                                                                                                                                                                                                                                                                                                                                                                                                                                                                                                                   |
| 34  | Anti-Campylobacter Pylori | 5       | All Fields      |                                                                                                                                                                                                                                                                                                                                                                                                                                                                                                                                                                                                                                                                                                                                                                                                   |
| 35  | OR / 32-34                | 14 010  |                 |                                                                                                                                                                                                                                                                                                                                                                                                                                                                                                                                                                                                                                                                                                                                                                                                   |
| 36  | 13 AND 35                 | 1 999   |                 | ((((((((((((((Eradicat*) OR Eradicant*) OR Eliminat*) OR Anti-Bacterial Agents[mesh]) OR Anti-Ulcer Agents[mesh]) OR Anti-Ulcer Agent*) OR Anti Bacterial*) OR Antibacterial*) OR Bacteriocid*)) AND (((((((((((((((Helicobacter Pylori[mesh]) OR Helicobacter Pylori) OR H. Pylori) OR Campylobacter Pylori) OR Helicobacter Infections[mesh]) OR Helicobacter Infect*) OR Infect* Helicobacter)))) OR Anti-Helicobacter Pylori) OR Anti-Campylobacter Pylori)) AND (((((((((((((((Dyspepsia [esh]) OR #2) OR Dyspepsia*) OR Dyspepsia[mesh]) OR Dyspeptic) OR Dyspepsie*) OR Indigest*) OR Maldigest*) OR "Upset stomach") OR "Stomach upset") OR Apepsy) OR jpepsy) OR Apepsia) OR Non-ulcer Dyspepsia) OR Funtional Dyspepsia*) OR functional Dyspepsia*) OR Upset stomach) OR Stomach upset) |
|     | Total                     |         | 128             |                                                                                                                                                                                                                                                                                                                                                                                                                                                                                                                                                                                                                                                                                                                                                                                                   |

\* Embase Search Limits

- a. Humans
- b. Adult (19+)
- c. English, Korean
- d. 2007~Curr.
- e. RCT/Clinical Trials/Meta-Analysis

| No. | Keyword                            | Results   | Search category | Remarks |
|-----|------------------------------------|-----------|-----------------|---------|
| 1   | Dyspepsia                          | 8 339     | MeSH            |         |
| 2   | Dyspepsia*                         | 14 969    | All Fields      |         |
| 3   | Dyspeptic                          | 5 006     | All Fields      |         |
| 4   | Dyspepsie*                         | 470       | All Fields      |         |
| 5   | Indigestion                        | 155       | Emtree          |         |
| 6   | Indigestion                        | 1 306     | All Fields      |         |
| 7   | Digestive System Function Disorder | 212 721   | Emtree          |         |
| 8   | Maldigest*                         | 852       | All Fields      |         |
| 9   | Upset Stomach                      | 89        | All Fields      |         |
| 10  | Stomach Upset                      | 82        | All Fields      |         |
| 11  | Apepsy                             | 0         | All Fields      |         |
| 12  | Apepsia                            | 3         | All Fields      |         |
| 13  | Non Ulcer Dyspepsia                | 11        | Emtree          |         |
| 14  | Non Ulcer Dyspepsia                | 1 327     | All Fields      |         |
| 15  | Functional Dyspepsia*              | 2         | All Fields      |         |
| 16  | OR / 1-15                          | 223 916   |                 |         |
| 17  | Helicobacter Pylori                | 24 465    | Emtree          |         |
| 18  | Helicobacter Pylori                | 46 491    | All Fields      |         |
| 19  | H. Pylori                          | 32 829    | All Fields      |         |
| 20  | Campylobacter Pylori               | 1 209     | All Fields      |         |
| 21  | Helicobacter Infections            | 15 427    | Emtree          |         |
| 22  | Helicobacter Infect*               | 780       | All Fields      |         |
| 23  | Infect* Helicobacter               | 111       | All Fields      |         |
| 24  | OR / 17-23                         | 54 328    |                 |         |
| 25  | Eradication                        | 29        | Emtree          |         |
| 26  | Eradication                        | 45 825    | All Fields      |         |
| 27  | Eradicant*                         | 20        | All Fields      |         |
| 28  | Elimination                        | 147 355   | All Fields      |         |
| 29  | Antiinfective Agent                | 1 248 357 | Emtree          |         |
| 30  | Antiinfective Agent                | 27        | All Fields      |         |
| 31  | Anti-Bacterial Agent*              | 820       | All Fields      |         |
| 32  | Antiulcer Agent                    | 94 411    | Emtree          |         |
| 33  | Antiulcer Agent                    | 308       | All Fields      |         |
| 34  | Anti-Ulcer Agent*                  | 451       | All Fields      |         |
| 35  | Anti Bacterial*                    | 4 778     | All Fields      |         |
| 36  | Antibacterial*                     | 80 365    | All Fields      |         |
| 37  | Bactericide                        | 1 582     | Emtree          |         |
| 38  | Bactericide                        | 1 032     | All Fields      |         |
| 39  | OR / 25-38                         | 1 539 311 |                 |         |
| 40  | 24 AND 39                          | 18 459    |                 |         |
| 41  | Anti-Helicobacter Pylori           | 921       | All Fields      |         |
| 42  | Anti-Campylobacter Pylori          | 5         | All Fields      |         |
| 43  | OR / 40-42                         | 926       |                 |         |
| 44  | 16 AND 43                          | 3 310     |                 |         |
|     | Total                              |           | 137             |         |

\* Cochrane Library Search Limits

- a. Humans
- b. Adult (19+)
- c. English, Korean
- d. 2007~Curr.
- e. RCT/Clinical Trials/Meta-Analysis

| No. | Keyword                   | Results | Search category | Remarks |
|-----|---------------------------|---------|-----------------|---------|
| 1   | Dyspepsia                 | 5       | MeSH            |         |
| 2   | Dyspepsia*                | 322     | All Fields      |         |
| 3   | Dyspeptic                 | 25      | All Fields      |         |
| 4   | Dyspepsie*                | 12      | All Fields      |         |
| 5   | Indigest*                 | 90      | All Fields      |         |
| 6   | Maldigest*                | 7       | All Fields      |         |
| 7   | Upset stomach             | 15      | All Fields      |         |
| 8   | Stomach upset             | 21      | All Fields      |         |
| 9   | Apepsy                    | 0       | All Fields      |         |
| 10  | Apepsia                   | 0       | All Fields      |         |
| 11  | Non-ulcer Dyspepsia       | 14      | All Fields      |         |
| 12  | Functional Dyspepsia*     | 1       | All Fields      |         |
| 13  | OR / 1-12                 | 423     |                 |         |
| 14  | Helicobacter Pylori       | 10      | MeSH            |         |
| 15  | Helicobacter Pylori       | 65      | All Fields      |         |
| 16  | H. Pylori                 | 49      | All Fields      |         |
| 17  | Campylobacter Pylori      | 0       | All Fields      |         |
| 18  | Helicobacter Infections   | 10      | MeSH            |         |
| 19  | Helicobacter Infect*      | 18      | All Fields      |         |
| 20  | Infect* Helicobacter      | 4       | All Fields      |         |
| 21  | OR / 14-20                | 73      |                 |         |
| 22  | Eradicat*                 | 391     | All Fields      |         |
| 23  | Eradicant*                | 0       | All Fields      |         |
| 24  | Eliminat*                 | 1 845   | All Fields      |         |
| 25  | Anti-Bacterial Agents     | 296     | MeSH            |         |
| 26  | Anti-Ulcer Agents         | 12      | MeSH            |         |
| 27  | Anti-Ulcer Agent*         | 15      | All Fields      |         |
| 28  | Anti Bacterial*           | 342     | All Fields      |         |
| 29  | Antibacterial*            | 292     | All Fields      |         |
| 30  | Bacteriocid*              | 41      | All Fields      |         |
| 31  | OR / 22-30                | 2 370   |                 |         |
| 32  | 21 AND 31                 | 54      |                 |         |
| 33  | Anti-Helicobacter Pylori  | 3       | All Fields      |         |
| 34  | Anti-Campylobacter Pylori | 0       | All Fields      |         |
| 35  | OR / 32-34                | 54      |                 |         |
| 36  | 13 AND 35                 | 34      |                 |         |
|     | Total                     |         | 9               |         |

\* KoreaMed Search Limits

- a. Humans
- b. Adult (19+)
- c. English, Korean
- d. 2007~Curr.
- e. RCT/Clinical Trials/Meta-Analysis

| No. | Keyword              | Results | Search category | Remarks                                                                                                                                          |
|-----|----------------------|---------|-----------------|--------------------------------------------------------------------------------------------------------------------------------------------------|
| 1   | Dyspepsia*           | 554     | All Fields      |                                                                                                                                                  |
| 2   | Dyspeptic            | 61      | All Fields      |                                                                                                                                                  |
| 3   | Indigest*            | 218     | All Fields      |                                                                                                                                                  |
| 4   | Maldigest*           | 3       | All Fields      |                                                                                                                                                  |
| 5   | Upset stomach        | 1       | All Fields      |                                                                                                                                                  |
| 6   | Stomach upset        | 2       | All Fields      |                                                                                                                                                  |
| 7   | OR / 1-6             | 636     |                 | Dyspepsia* [ALL] OR Dyspeptic [ALL] OR Indigest* [ALL] OR Maldigest* [ALL] OR "Upset stomach" [ALL] OR "Stomach upset"[ALL]                      |
| 8   | Helicobacter Pylori  | 1 182   | All Fields      |                                                                                                                                                  |
| 9   | H. Pylori            | 953     | All Fields      |                                                                                                                                                  |
| 10  | Campylobacter Pylori | 1       | All Fields      |                                                                                                                                                  |
| 11  | Helicobacter Infect* | 247     | All Fields      |                                                                                                                                                  |
| 12  | Infect* Helicobacter | 14      | All Fields      |                                                                                                                                                  |
| 13  | OR / 8-12            | 1 251   |                 | "Helicobacter Pylori" [ALL] OR "H. Pylori" [ALL] OR "Campylobacter Pylori" [ALL] OR "Helicobacter Infect*" [ALL] OR "Infect* Helicobacter" [ALL] |
| 14  | Eradicat*            | 867     | All Fields      |                                                                                                                                                  |
| 15  | Eliminat*            | 1 483   | All Fields      |                                                                                                                                                  |
| 16  | Anti-Ulcer Agent*    | 47      | All Fields      |                                                                                                                                                  |
| 17  | Anti Bacterial*      | 3 689   | All Fields      |                                                                                                                                                  |
| 18  | Antibacterial*       | 290     | All Fields      |                                                                                                                                                  |
| 19  | Bacteriocid*         | 4       | All Fields      |                                                                                                                                                  |



\* KoreaMed Search Limits

- a. Humans
- b. Adult (19+)
- c. English, Korean
- d. 2007~Curr.
- e. RCT/Clinical Trials/Meta-Analysis

| No. | Keyword    | Results | Search category | Remarks                                                                                                                                                                                                                                                                                                                                                                                                                                    |
|-----|------------|---------|-----------------|--------------------------------------------------------------------------------------------------------------------------------------------------------------------------------------------------------------------------------------------------------------------------------------------------------------------------------------------------------------------------------------------------------------------------------------------|
| 20  | OR / 14-19 | 6 047   |                 | Eradicat* [ALL] OR Eliminat* [ALL] OR "Anti-Ulcer Agent*" [ALL] OR "Anti Bacterial*" [ALL] OR Antibacterial* [ALL] OR Bacteriocid* [ALL]                                                                                                                                                                                                                                                                                                   |
| 21  | 13 AND 20  | 493     |                 | ("Helicobacter Pylori" [ALL] OR "H. Pylori" [ALL] OR "Campylobacter Pylori" [ALL] OR "Helicobacter Infect*" [ALL] OR "Infect* Helicobacter" [ALL]) AND (Eradicat* [ALL] OR Eliminat* [ALL] OR "Anti-Ulcer Agent*" [ALL] OR "Anti Bacterial*" [ALL] OR Antibacterial* [ALL] OR Bacteriocid* [ALL])                                                                                                                                          |
| 22  | 7 AND 21   | 43      |                 | ("Helicobacter Pylori" [ALL] OR "H. Pylori" [ALL] OR "Campylobacter Pylori" [ALL] OR "Helicobacter Infect*" [ALL] OR "Infect* Helicobacter" [ALL] ) AND ( Eradicat* [ALL] OR Eliminat* [ALL] OR "Anti-Ulcer Agent*" [ALL] OR "Anti Bacterial*" [ALL] OR Antibacterial* [ALL] OR Bacteriocid* [ALL] ) AND ( Dyspepsia* [ALL] OR Dyspeptic [ALL] OR Indigest* [ALL] OR Mal-digest* [ALL] OR "Upset stomach" [ALL] OR "Stomach upset" [ALL] ) |
|     | Total      |         | 14              |                                                                                                                                                                                                                                                                                                                                                                                                                                            |

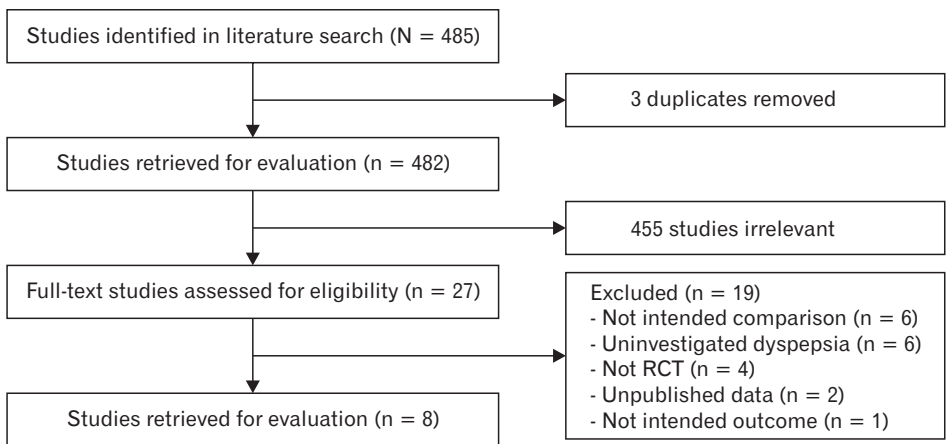

**Supplementary Figure 1.** PRISMA flow diagram of proton pump inhibitors. RCT, randomized controlled trial.

|                   | Random sequence generation (selection bias) | Allocation concealment (selection bias) | Blinding of participants and personnel (performance bias) | Blinding of outcome assessment (detection bias) | Incomplete outcome data (attrition bias) | Selective reporting (reporting bias) | Other bias |
|-------------------|---------------------------------------------|-----------------------------------------|-----------------------------------------------------------|-------------------------------------------------|------------------------------------------|--------------------------------------|------------|
| Armstrong 2005    | ●                                           | ●                                       | ●                                                         | ●                                               | ●                                        | ●                                    | ●          |
| Dewan 2011        | ●                                           | ●                                       | ●                                                         | ●                                               | ●                                        | ●                                    | ●          |
| Fletcher 2011     | ●                                           | ●                                       | ●                                                         | ●                                               | ●                                        | ●                                    | ●          |
| Gerson 2005       | ●                                           | ●                                       | ●                                                         | ●                                               | ●                                        | ●                                    | ●          |
| Iwakiri 2013      | ●                                           | ●                                       | ●                                                         | ●                                               | ●                                        | ●                                    | ●          |
| Kato 2005         | ●                                           | ●                                       | ●                                                         | ●                                               | ●                                        | ●                                    | ●          |
| Leung 2007        | ●                                           | ●                                       | ●                                                         | ●                                               | ●                                        | ●                                    | ●          |
| Maity 2014        | ●                                           | ●                                       | ●                                                         | ●                                               | ●                                        | ●                                    | ●          |
| Majewski 2016     | ●                                           | ●                                       | ●                                                         | ●                                               | ●                                        | ●                                    | ●          |
| Suzuki 2013       | ●                                           | ●                                       | ●                                                         | ●                                               | ●                                        | ●                                    | ●          |
| Talley 2007       | ●                                           | ●                                       | ●                                                         | ●                                               | ●                                        | ●                                    | ●          |
| Van Rensburg 2008 | ●                                           | ●                                       | ●                                                         | ●                                               | ●                                        | ●                                    | ●          |
| Van Zanten 2006   | ●                                           | ●                                       | ●                                                         | ●                                               | ●                                        | ●                                    | ●          |
| Van Zanten 2011   | ●                                           | ●                                       | ●                                                         | ●                                               | ●                                        | ●                                    | ●          |
| Veldhuyzen 2005   | ●                                           | ●                                       | ●                                                         | ●                                               | ●                                        | ●                                    | ●          |

**Supplementary Figure 2.** Risk of bias summary of proton pump inhibitors on functional dyspepsia: review authors' judgements about each risk of bias item for each included study.

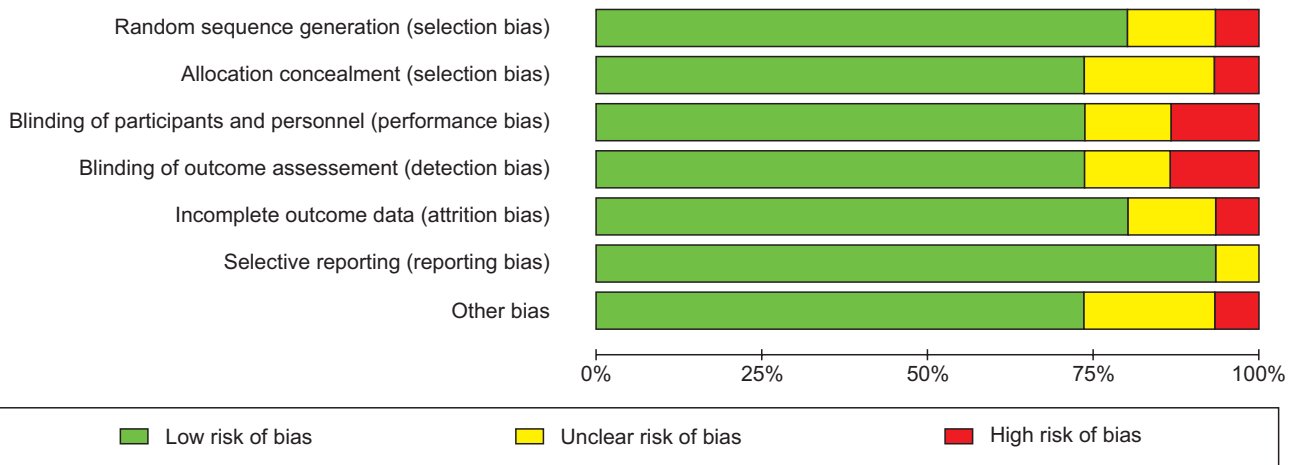

**Supplementary Figure 3.** Risk of bias graph of proton pump inhibitor on functional dyspepsia: review authors' judgements about each risk of bias item presented as percentages across all included studies.

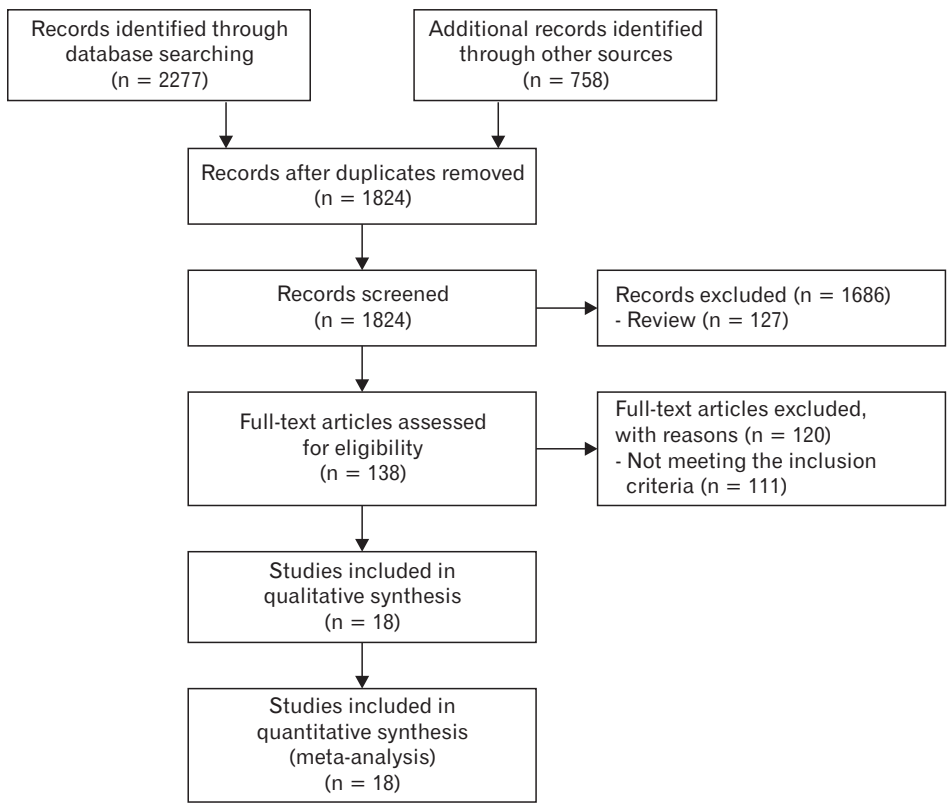

**Supplementary Figure 4.** PRISMA flow diagram of *Helicobacter pylori*.

|                      | Random sequence generation (selection bias) | Allocation concealment (selection bias) | Blinding of participants and personnel (performance bias) | Blinding of outcome assessment (detection bias) | Incomplete outcome data (attrition bias) | Selective reporting (reporting bias) | Other bias |
|----------------------|---------------------------------------------|-----------------------------------------|-----------------------------------------------------------|-------------------------------------------------|------------------------------------------|--------------------------------------|------------|
| Ang 2006             | ●                                           | ●                                       | ●                                                         | ●                                               | ●                                        | ●                                    | ●          |
| Blum 1998            | ●                                           | ●                                       | ●                                                         | ●                                               | ●                                        | ●                                    | ●          |
| Chiba 2002           | ●                                           | ●                                       | ●                                                         | ●                                               | ●                                        | ●                                    | ●          |
| Froehlich 2001       | ●                                           | ●                                       | ●                                                         | ●                                               | ●                                        | ●                                    | ●          |
| Gisbert 2004         | ●                                           | ●                                       | ●                                                         | ●                                               | ●                                        | ●                                    | ●          |
| Gwee 2009            | ●                                           | ●                                       | ●                                                         | ●                                               | ●                                        | ●                                    | ●          |
| Hsu 2001             | ●                                           | ●                                       | ●                                                         | ●                                               | ●                                        | ●                                    | ●          |
| Koskenpato 2001      | ●                                           | ●                                       | ●                                                         | ●                                               | ●                                        | ●                                    | ●          |
| Malfertheiner 2003   | ●                                           | ●                                       | ●                                                         | ●                                               | ●                                        | ●                                    | ●          |
| Mazzoleni 2006       | ●                                           | ●                                       | ●                                                         | ●                                               | ●                                        | ●                                    | ●          |
| Mazzoleni 2011       | ●                                           | ●                                       | ●                                                         | ●                                               | ●                                        | ●                                    | ●          |
| McColl 1998          | ●                                           | ●                                       | ●                                                         | ●                                               | ●                                        | ●                                    | ●          |
| Sodhi 2013           | ●                                           | ●                                       | ●                                                         | ●                                               | ●                                        | ●                                    | ●          |
| Talley 1999          | ●                                           | ●                                       | ●                                                         | ●                                               | ●                                        | ●                                    | ●          |
| Talley 1999 (ORCHID) | ●                                           | ●                                       | ●                                                         | ●                                               | ●                                        | ●                                    | ●          |
| Varannes 2001        | ●                                           | ●                                       | ●                                                         | ●                                               | ●                                        | ●                                    | ●          |
| Yazdanbod 2015       | ●                                           | ●                                       | ●                                                         | ●                                               | ●                                        | ●                                    | ●          |
| Zanten 2003          | ●                                           | ●                                       | ●                                                         | ●                                               | ●                                        | ●                                    | ●          |

**Supplementary Figure 5.** Risk of bias summary in *Helicobacter pylori* on functional dyspepsia: review authors' judgements about each risk of bias item for each included study.

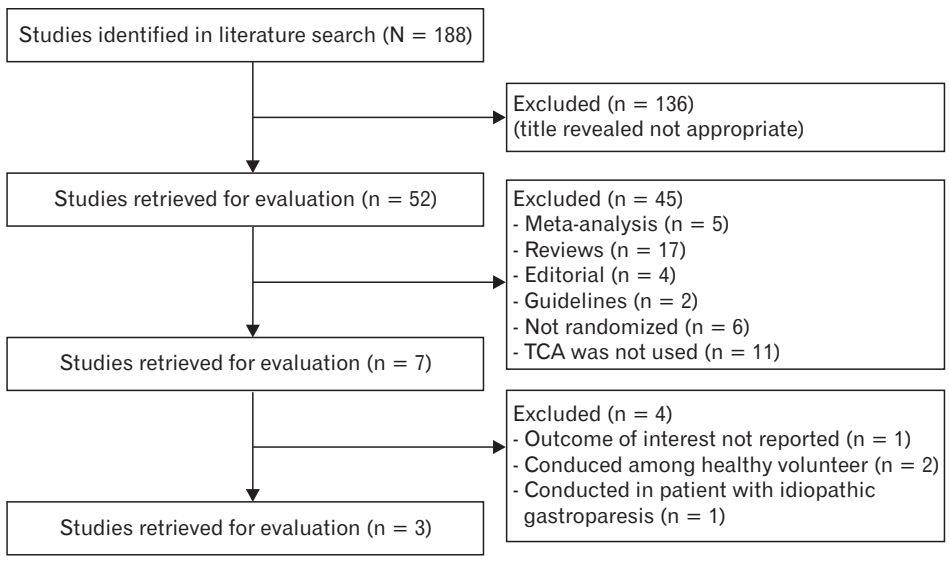

**Supplementary Figure 6.** PRISMA flow diagram of tricyclic antidepressants. TCA, tricyclic antidepressant.

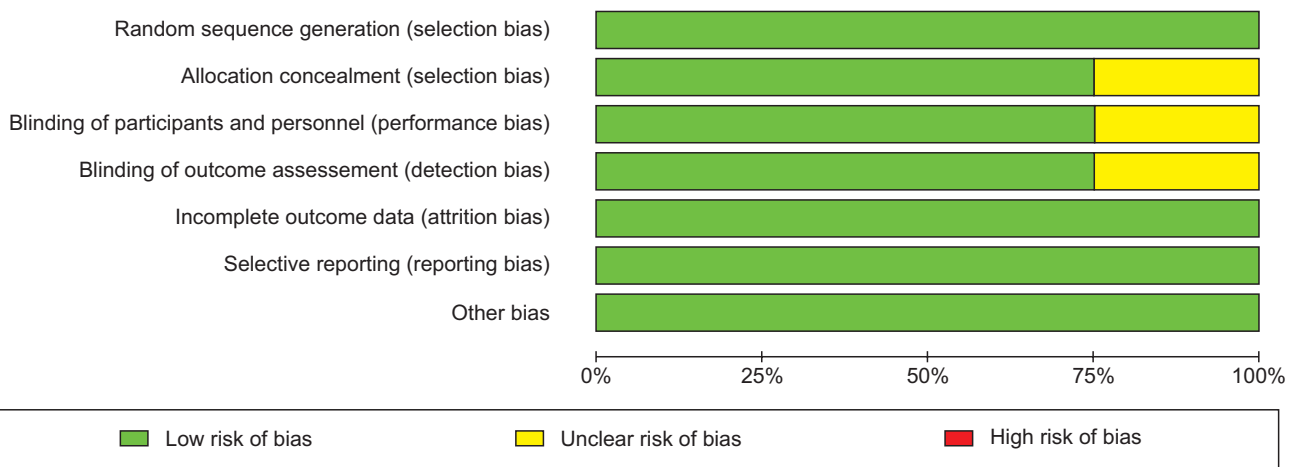

**Supplementary Figure 7.** Risk of bias graph of tricyclic antidepressants on functional dyspepsia: review authors' judgements about each risk of bias item presented as percentages across all included studies.



|                       | Random sequence generation (selection bias) | Allocation concealment (selection bias) | Blinding of participants and personnel (performance bias) | Blinding of outcome assessment (detection bias) | Incomplete outcome data (attrition bias) | Selective reporting (reporting bias) | Other bias |
|-----------------------|---------------------------------------------|-----------------------------------------|-----------------------------------------------------------|-------------------------------------------------|------------------------------------------|--------------------------------------|------------|
| Braak 2011            | ●                                           | ●                                       | ●                                                         | ●                                               | ●                                        | ●                                    | ●          |
| Cheong 2018           | ●                                           | ●                                       | ●                                                         | ●                                               | ●                                        | ●                                    | ●          |
| Kaosambatwattana 2018 | ●                                           | ●                                       | ●                                                         | ●                                               | ●                                        | ●                                    | ●          |
| Talley 2015           | ●                                           | ●                                       | ●                                                         | ●                                               | ●                                        | ●                                    | ●          |

**Supplementary Figure 8.** Risk of bias summary of tricyclic antidepressants on functional dyspepsia: review authors' judgements about each risk of bias item presented as percentages across all included studies.
